# Supplementary material for: Investigation of the kinetic and mass transport limitations in thermoelectrochemical cells with different electrode materials
Source: Royal Society of Chemistry journal article supplement (doi:10.1039/c3cp54577f), 2013-12-20
Supplement: c3cp54577f.pdf [file c3cp54577f.pdf]

## Supporting Information

### Investigation of the kinetic and mass transport limitations in thermoelectrochemical cells with different electrode materials

Theodore J. Abraham,<sup>a</sup> Naoki Tachikawa,<sup>a</sup> Douglas R. MacFarlane,<sup>a</sup> and Jennifer M.  
Pringle<sup>b\*</sup>

<sup>a</sup>) ARC Centre of Excellence for Electromaterials Science, School of Chemistry,  
Monash University Clayton, Victoria 3800, Australia. <sup>b</sup>) ARC Centre of Excellence  
for Electromaterials Science, Institute for Frontier Materials, Deakin University, 221  
Burwood Highway, Burwood, VIC 3125, Australia.

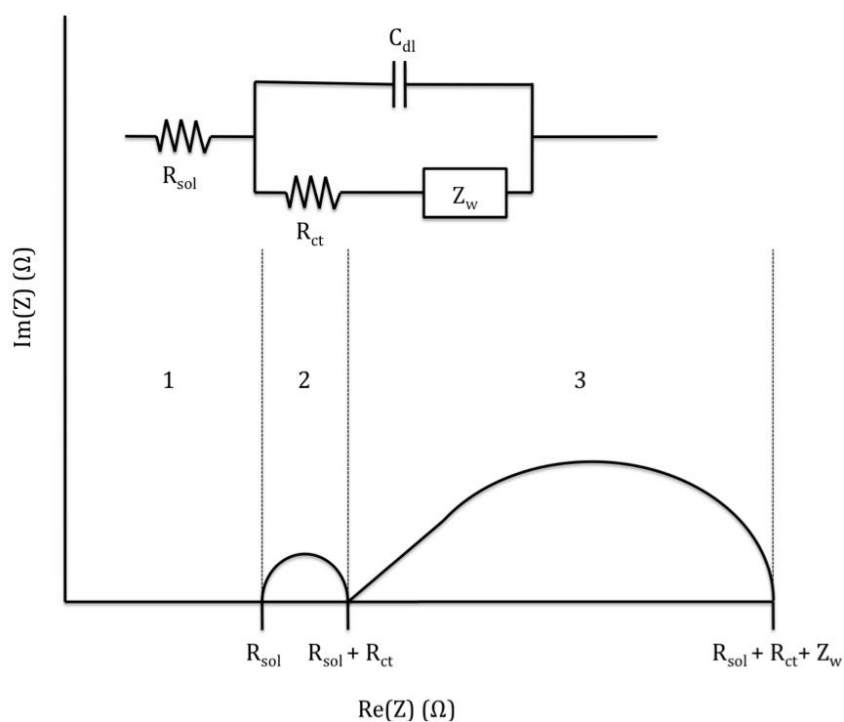

**Figure S1.** Schematic of the electrochemical impedance spectroscopy in a diffusion bounded cell, with three distinctive regions of impedance and the equivalent circuit inset.

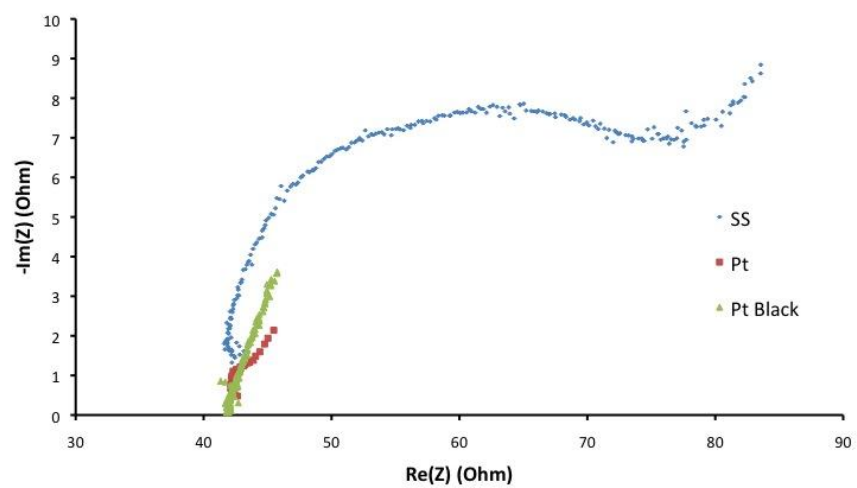

**Figure S2.** Typical electrochemical impedance spectroscopy plot, measured at 130°C.
